## Mechanics and energetics of swinging the human leg

J. Doke, J. M. Donelan and A. D. Kuo

10.1242/jeb.006767

There was an error published in *J. Exp. Biol.* **208**, 439-445.

An error was introduced into Equation 1 on p. 440 during the production process.

The correct equation is as follows:

$$\ddot{\theta} + \omega_n^2 \theta = T \quad (1)$$

We apologise to authors and readers for this error.
